# Supplementary material for: Investigating the response of China's surface ozone concentration to the future changes of multiple factors
Source: Copernicus journal article supplement (doi:10.5194/acp-25-2649-2025), 2025-02-28
Supplement: Supplementary file 1 [file acp-25-2649-2025-supplement.pdf]

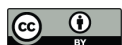

*Supplement of*

## **Investigating the response of China's surface ozone concentration to the future changes of multiple factors**

**Jinya Yang et al.**

*Correspondence to:* Yu Zhao (yuzhao@nju.edu.cn)

The copyright of individual parts of the supplement might differ from the article licence.

16 **Number of tables: 3      Number of figures: 7**

17 **Table list**

18 Table S1 Statistical metrics for comparison between the observed and simulated  
19 monthly average meteorological variables and MDA8 O<sub>3</sub> in 2020. OBS is mean of  
20 observation, SIM is mean of simulation, and Bias is mean bias between SIM and OBS.  
21 R, NMB, NME and IOA refers to the correlation coefficient, normalized mean bias,  
22 normalized mean error and index of agreement between SIM and OBS, respectively.

23 Table S2 Comparison of BVOCs estimates between this study and previous estimations  
24 for 2020.

25 Table S3 Coefficients of variation (CVs) for simulated O<sub>3</sub> concentrations within five-  
26 year simulations for the whole country (CHN) and selected developed regions (BTH,  
27 YRD, and PRD).

28 **Figure list**

29 Figure S1 The NO<sub>x</sub> and NMVOCs emissions in 2020 and 2060 for the surrounding  
30 areas within the modelling domain but excluding Chinese mainland (SURR), Chinese  
31 mainland (CHN), as well as the three regions. Data illustrated are obtained from MEIC  
32 for 2020 and DPEC for 2060 within Chinese mainland, and SSP dataset for the rest.

33 Figure S2 Spatial distribution of the observation (circles) and simulation (shaded) of  
34 monthly average MDA8 O<sub>3</sub> in 2020 across China.

35 Figure S3 The spatial distribution of BVOCs emissions of the 2020s and the difference  
36 between the 2060s and 2020s.

37 Figure S4 The distribution of O<sub>3</sub> seasons across China and the three regions, and the  
38 top six months with the highest levels of O<sub>3</sub> pollution are covered by darker color. Note  
39 that there is discrepancy between simulation and observation in PRD for 2020s.  
40 February and March are simulated as two of the six most polluted months, while the  
41 observation indicates April and May.

42 Figure S5 The emission reduction rates for the two precursors during 2020 and 2060  
43 over China and the three regions.

44 Figure S6 Simulation and projection of hourly O<sub>3</sub> and O<sub>x</sub> in the 2020s and 2060s over  
45 China and the three regions.

46 Figure S7 Projected seasonal O<sub>3</sub> exceedance over the east of China in the 2020s and  
47 2060s, and the exceedance changes when the four factors at 2060s level.

48

49 **Tables**

50 Table S1 Statistical metrics for comparison between the observed and simulated  
 51 monthly average meteorological variables and MDA8 O<sub>3</sub> in 2020. OBS is mean of  
 52 observation, SIM is mean of simulation, and Bias is mean bias between SIM and OBS. R,  
 53 NMB, NME and IOA refers to the correlation coefficient, normalized mean bias,  
 54 normalized mean error and index of agreement between SIM and OBS, respectively.

| Variables                       | OBS                    | SIM    | Bias  | R    | NMB     | NME     | IOA     |      |
|---------------------------------|------------------------|--------|-------|------|---------|---------|---------|------|
| T2 (°C)                         | 13.21                  | 12.53  | -0.69 | 0.96 | -5.20 % | 17.65 % | 0.98    |      |
| WS (m s <sup>-1</sup> )         | 2.60                   | 4.02   | 1.41  | 0.51 | 54.21 % | 60.04 % | 0.57    |      |
| WD (°)                          | 175.75                 | 174.78 | -0.97 | 0.51 | -0.55 % | 18.40 % | 0.72    |      |
| RH (%)                          | 65.25                  | 66.17  | 0.92  | 0.78 | 1.41 %  | 12.78 % | 0.88    |      |
| MDA8<br>O <sub>3</sub><br>(ppb) | Warm<br>season         | 57.45  | 65.56 | 8.11 | 0.71    | 14.12 % | 16.33 % | 0.74 |
|                                 | Non-<br>warm<br>season | 38.67  | 42.88 | 4.21 | 0.32    | 10.90 % | 25.48 % | 0.49 |

55

56 Table S2 Comparison of BVOCs estimates between this study and previous estimations.

| Species        | Period    | Annual emission<br>(Tg) | Reference          |
|----------------|-----------|-------------------------|--------------------|
| Total<br>BVOCs | 2020s     | 33.55                   | This study         |
|                | 2015–2019 | 29.28±0.91              | Ma et al. (2021)   |
|                | 2015–2019 | 31.42±0.95              | Ma et al. (2021)   |
|                | 2008–2018 | 54.60                   | Li et al. (2020)   |
|                | 2001–2016 | 34.27                   | Wang et al. (2021) |
|                | 2017      | 23.54                   | Wu et al. (2020)   |
| Isoprene       | 2020s     | 21.08                   | This study         |
|                | 2015–2019 | 13.88±0.57              | Ma et al. (2021)   |
|                | 2015–2019 | 14.29±0.54              | Ma et al. (2021)   |
|                | 2008–2018 | 29.30                   | Li et al. (2020)   |
|                | 2001–2016 | 15.94                   | Wang et al. (2021) |
|                | 2017      | 13.30                   | Wu et al. (2020)   |
| Terpenes       | 2020s     | 3.30                    | This study         |
|                | 2015–2019 | 5.28±0.12               | Ma et al. (2021)   |
|                | 2015–2019 | 4.77±0.11               | Ma et al. (2021)   |
|                | 2017      | 3.09                    | Wu et al. (2020)   |

57

58 Table S3 Coefficients of variation (CVs) for simulated O<sub>3</sub> concentrations within five-  
 59 year simulations for the whole country (CHN) and selected developed regions (BTH,  
 60 YRD, and PRD).

| Simulation | Warm Season |       |       |       | Non-warm Season |       |       |       |
|------------|-------------|-------|-------|-------|-----------------|-------|-------|-------|
|            | CHN         | BTH   | YRD   | PRD   | CHN             | BTH   | YRD   | PRD   |
| 2020s      | 2.6 %       | 5.7 % | 1.8 % | 4.0 % | 1.4 %           | 0.9 % | 2.7 % | 3.8 % |
| 2060s      | 1.5 %       | 4.0 % | 2.2 % | 5.6 % | 0.8 %           | 1.3 % | 2.1 % | 3.4 % |
| CLIM       | 1.9 %       | 5.9 % | 2.5 % | 6.5 % | 1.1 %           | 1.6 % | 4.1 % | 3.8 % |
| EMIS       | 2.2 %       | 3.3 % | 2.2 % | 3.7 % | 1.4 %           | 1.4 % | 1.5 % | 2.5 % |
| BVOC       | 2.6 %       | 5.0 % | 2.0 % | 4.3 % | 1.4 %           | 1.0 % | 2.3 % | 3.4 % |
| SURR       | 2.7 %       | 5.8 % | 1.7 % | 4.1 % | 1.5 %           | 0.9 % | 2.7 % | 3.9 % |

61

62 **Figures**

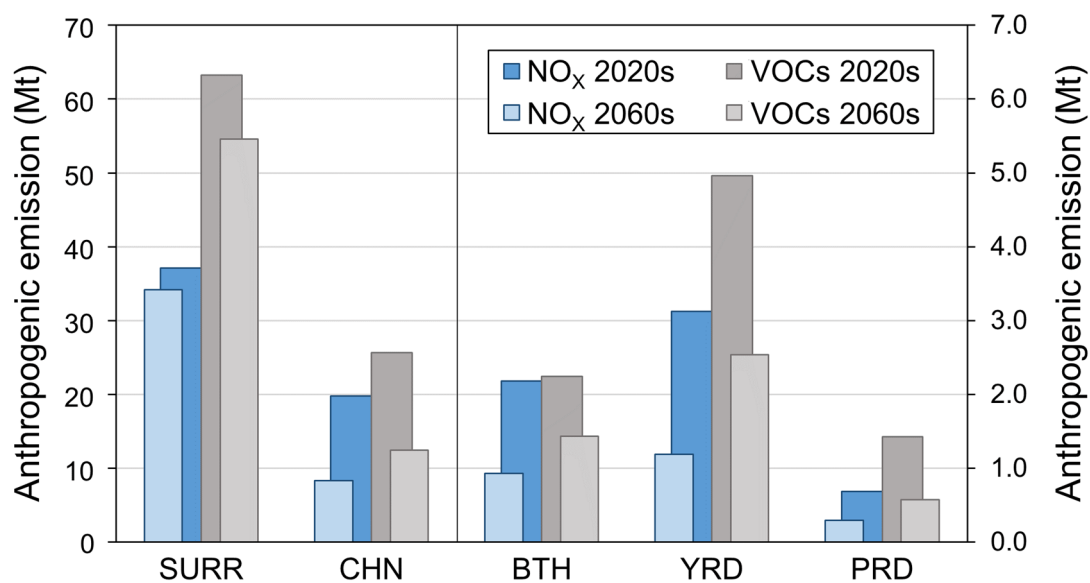

63 Figure S1 The NO<sub>x</sub> and NMVOCs emissions in 2020 and 2060 for the surrounding  
 64 areas within the modelling domain but excluding Chinese mainland (SURR), Chinese  
 65 mainland (CHN), as well as the three regions. Data illustrated are obtained from MEIC  
 66 for 2020 and DPEC for 2060 within Chinese mainland, and SSP dataset for the rest.

67

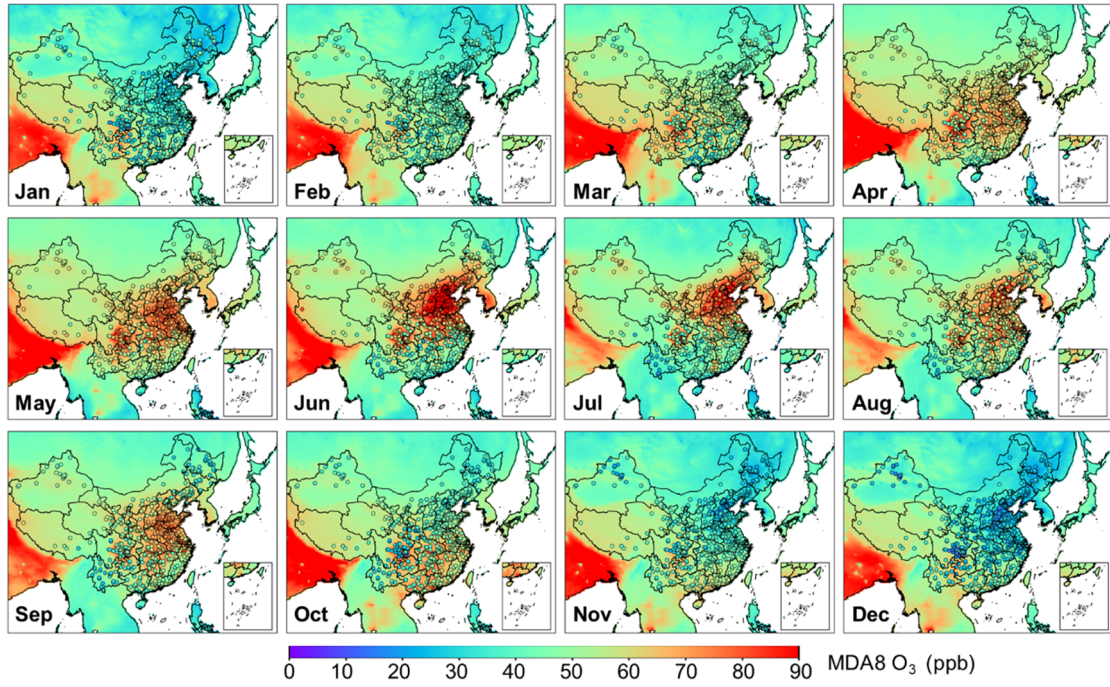

68

69 Figure S2 Spatial distribution of the observation (circles) and simulation (shaded) of  
 70 monthly average MDA8 O<sub>3</sub> in 2020 across China.

71

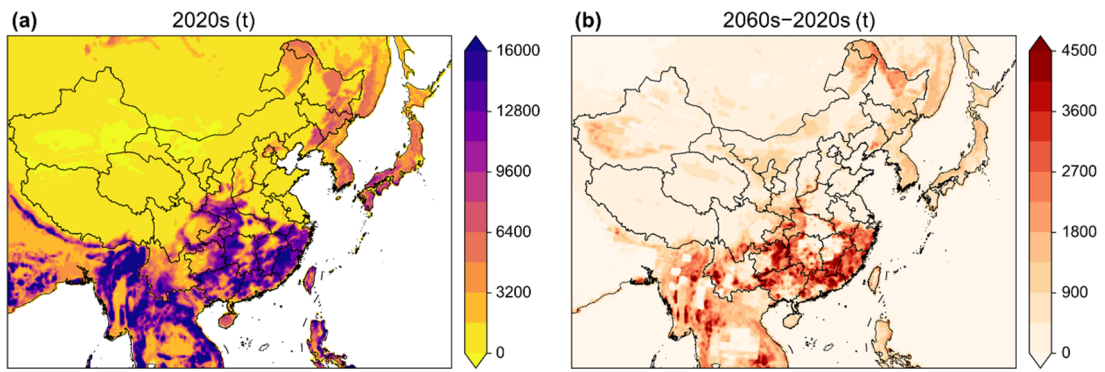

72

73 Figure S3 The spatial distribution of BVOCs emissions of the 2020s and the difference  
74 between the 2060s and 2020s.

75

76



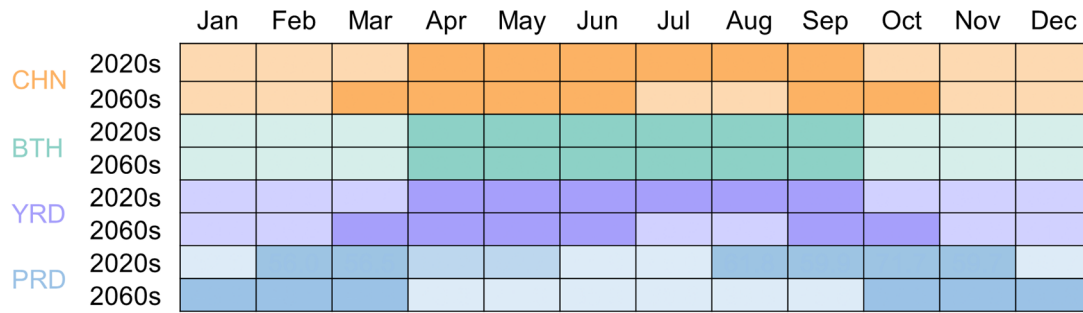

77 Figure S4 The distribution of O<sub>3</sub> seasons across China and the three regions, and the  
 78 top six months with the highest levels of O<sub>3</sub> pollution are covered by darker color. Note  
 79 that there is discrepancy between simulation and observation in PRD for 2020s.  
 80 February and March are simulated as two of the six most polluted months, while the  
 81 observation indicates April and May.

82

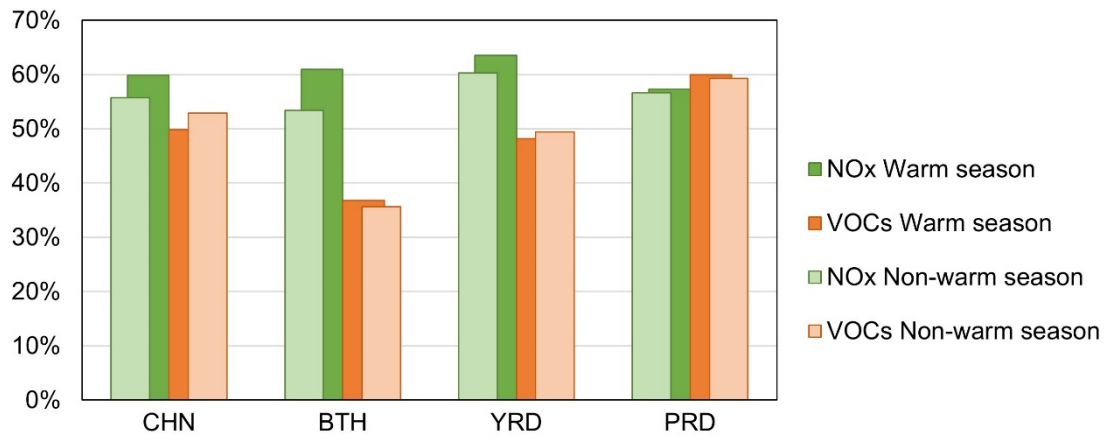

83 Figure S5 The emission reduction rates for the two precursors during 2020 and 2060  
 84 over China and the three regions.

85

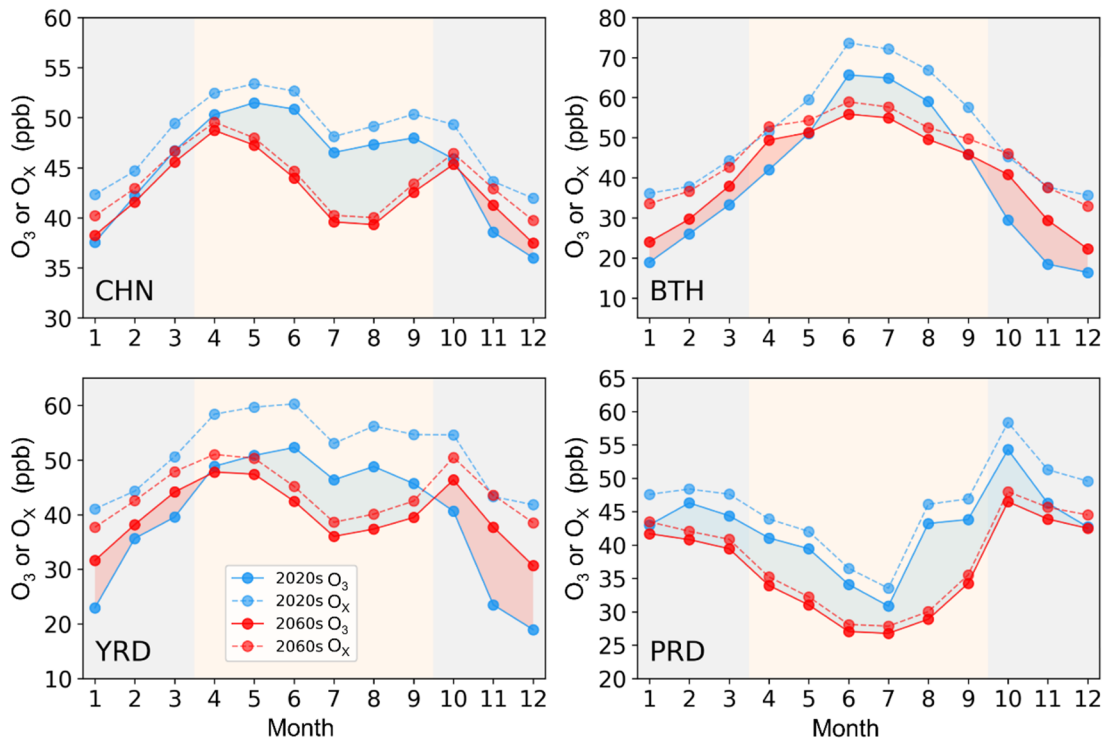

86 Figure S6 Simulation and projection of hourly O<sub>3</sub> and O<sub>x</sub> in the 2020s and 2060s over  
 87 China and the three regions.

88

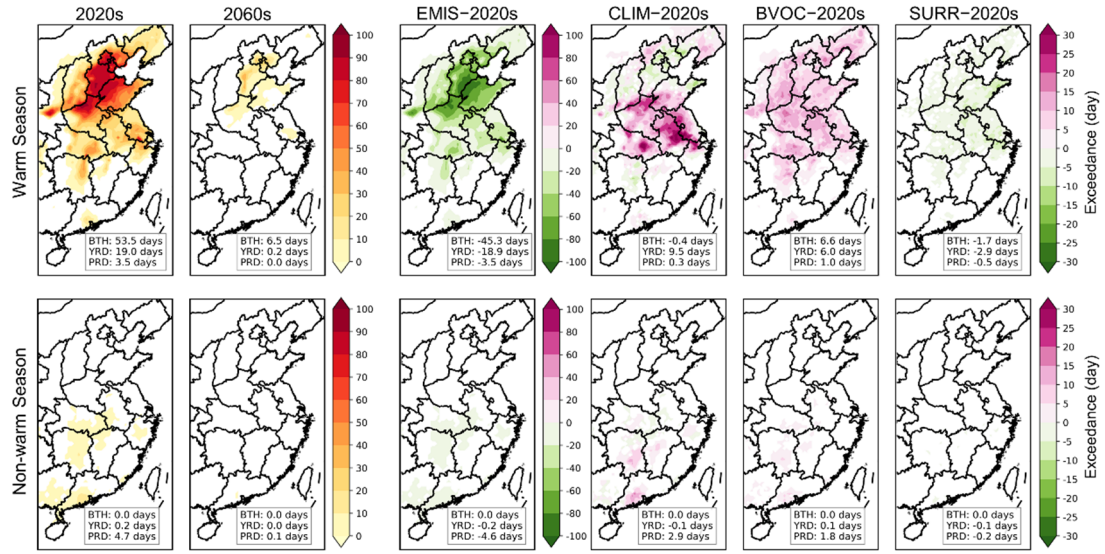

89 Figure S7 Projected seasonal O<sub>3</sub> exceedance over the east of China in the 2020s and  
 90 2060s, and the exceedance changes when the four factors at 2060s level.

91

## 92 **References**

- 93 Li, L., Yang, W., Xie, S., and Wu, Y.: Estimations and uncertainty of biogenic volatile  
94 organic compound emission inventory in China for 2008-2018, *Science of the Total*  
95 *Environment*, 733, 139301, 10.1016/j.scitotenv.2020.139301, 2020.
- 96 Ma, M., Gao, Y., Ding, A., Su, H., Liao, H., Wang, S., Wang, X., Zhao, B., Zhang, S.,  
97 Fu, P., Guenther, A. B., Wang, M., Li, S., Chu, B., Yao, X., and Gao, H.: Development  
98 and Assessment of a High-Resolution Biogenic Emission Inventory from Urban Green  
99 Spaces in China, *Environmental Science & Technology*, 10.1021/acs.est.1c06170, 2021.
- 100 Wang, H., Wu, Q., Guenther, A. B., Yang, X., Wang, L., Xiao, T., Li, J., Feng, J., Xu,  
101 Q., and Cheng, H.: A long-term estimation of biogenic volatile organic compound  
102 (BVOC) emission in China from 2001–2016: the roles of land cover change and climate  
103 variability, *Atmospheric Chemistry and Physics*, 21, 4825-4848, 10.5194/acp-21-4825-  
104 2021, 2021.
- 105 Wu, K., Yang, X., Chen, D., Gu, S., Lu, Y., Jiang, Q., Wang, K., Ou, Y., Qian, Y., Shao,  
106 P., and Lu, S.: Estimation of biogenic VOC emissions and their corresponding impact  
107 on ozone and secondary organic aerosol formation in China, *Atmospheric Research*,  
108 231, 10.1016/j.atmosres.2019.104656, 2020.
